# Supplementary material for: Knowledge, Attitude and Practice of the Community General Practice Teams on Dysphagia Complicated with Aspiration Pneumonia after Stroke
Source: MDPI journal article supplement (doi:10.3390/healthcare11233073), 2023-11-30
Supplement: s1 [file s1]

Article

# Knowledge, Attitude, and Practice of the Community General Practice Teams on Dysphagia Complicated with Aspiration Pneumonia after Stroke

Daikun He <sup>1,2,3</sup>, Xueting Shen <sup>1</sup>, Lina Wang <sup>2</sup> and Zhigang Pan <sup>1\*</sup>

<sup>1</sup>Department of General Practice, Zhongshan Hospital, Fudan University, Shanghai 200032, China;

<sup>2</sup>Department of General Practice, Jinshan Hospital, Fudan University, Shanghai 201508, China;

<sup>3</sup>Center of Emergency and Critical Care Medicine, Jinshan Hospital, Fudan University, Shanghai 201508, China

\* Correspondence: author Zhigang Pan Department of General Practice, Zhongshan Hospital, Fudan University, Shanghai 200032, China; Email: zhigang\_pan@163.com; Tel: +86-18616881251

## 1. Supplementary Materials

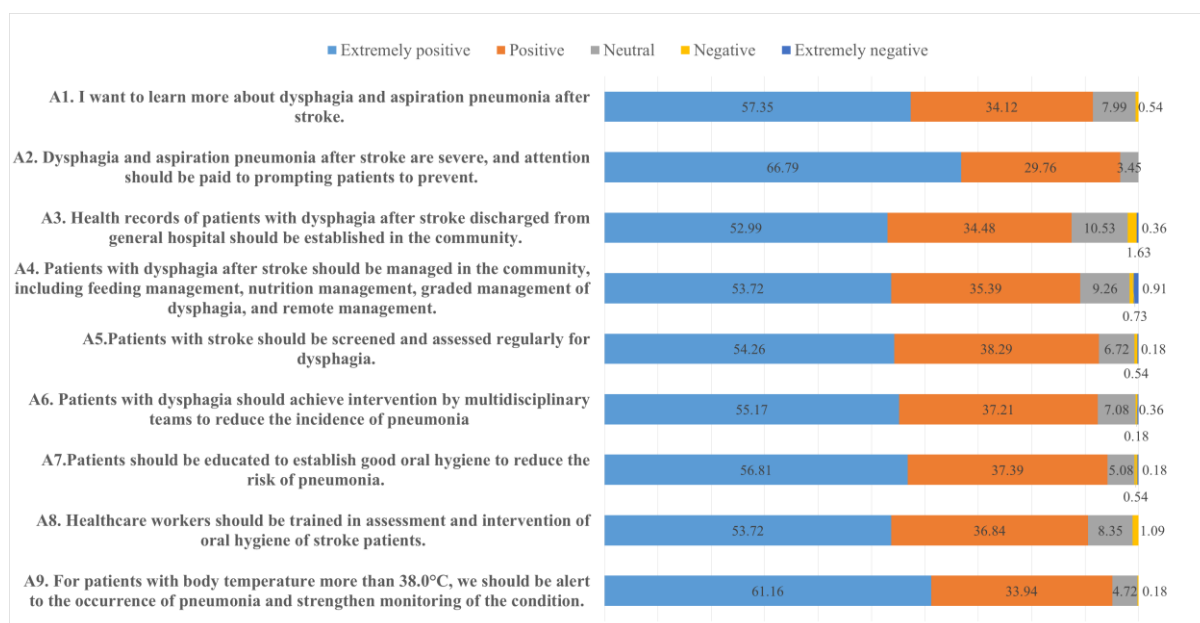

**Supplementary Figure S1.** The distribution of the “attitude” dimension.

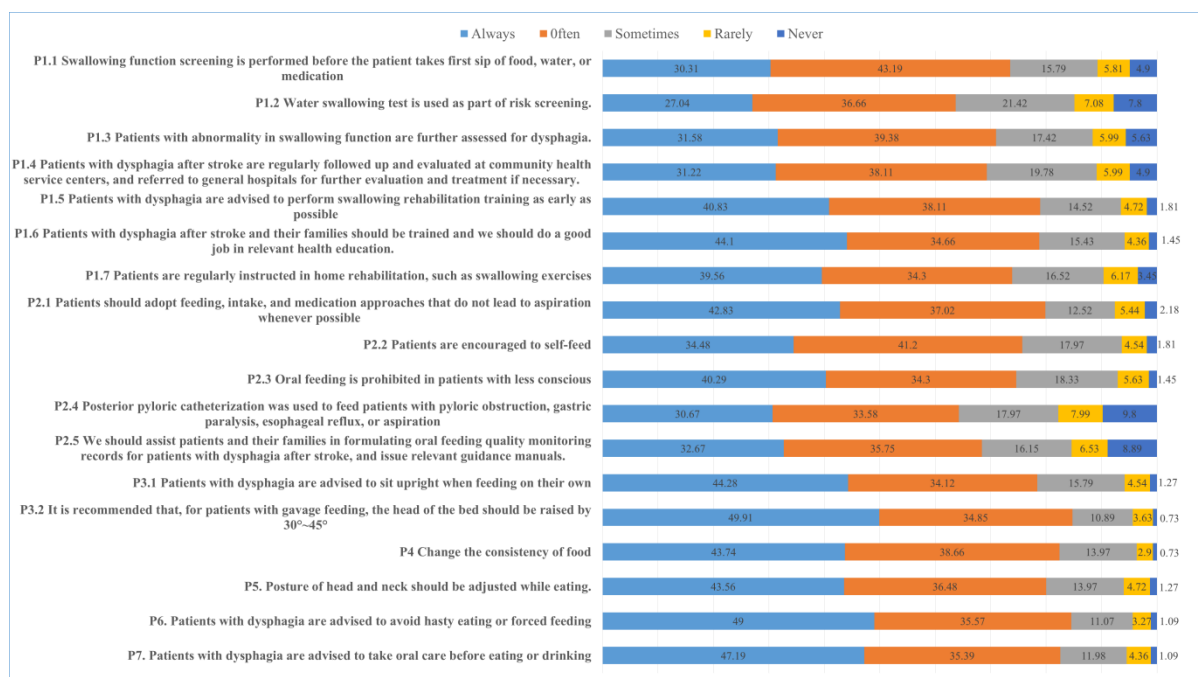

Supplementary Figure S2. The distribution of the “practice” dimension.

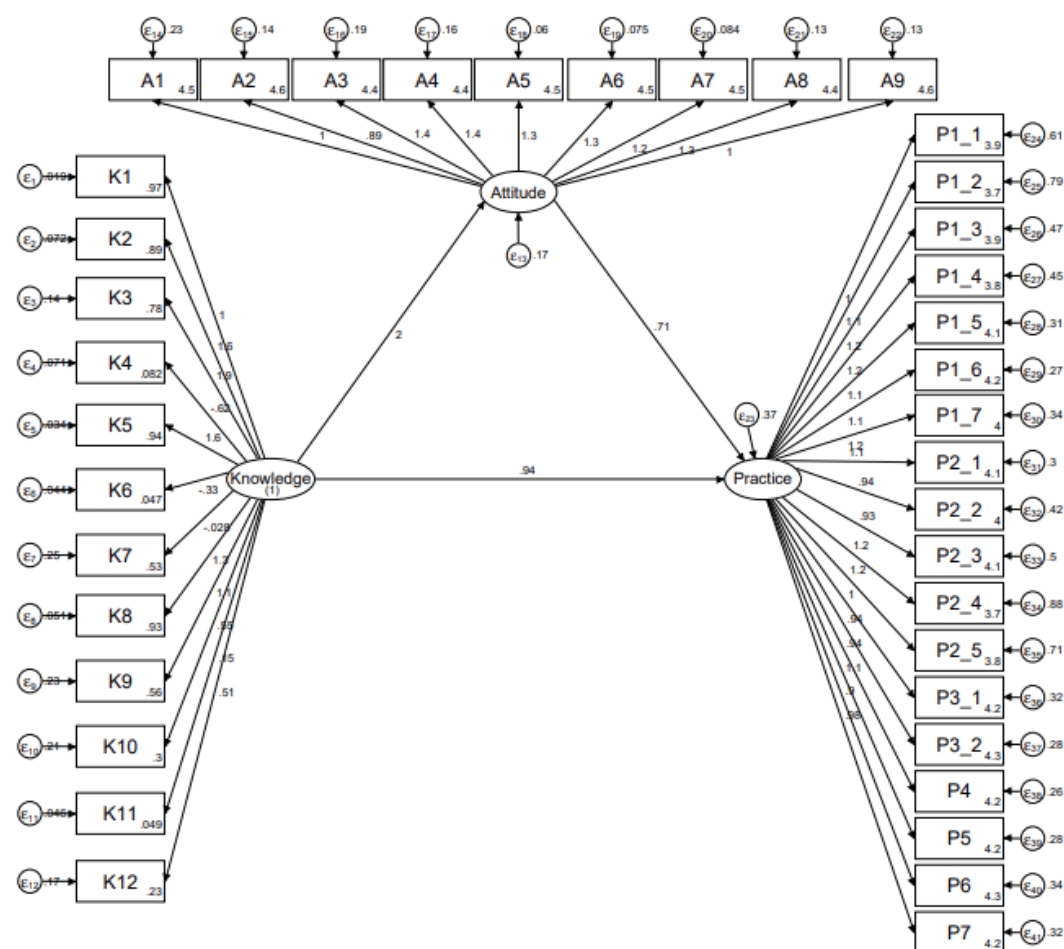

---

**Supplementary Figure S3.** Results of structural equation model (SEM) for the association among Knowledge, Attitude, and Practice.

**Supplementary Table S1.** Knowledge dimension.

| Knowledge, n (%)                                                                                                                                                                                       | Participants (n=551) |               |
|--------------------------------------------------------------------------------------------------------------------------------------------------------------------------------------------------------|----------------------|---------------|
|                                                                                                                                                                                                        | True                 | False/unclear |
| 1. Dysphagia is one of the most common clinical complications after stroke, greatly increasing the risk of death and poor prognosis.                                                                   | 535 (97.10)          | 16 (2.90)     |
| 2. Dysphagia is a major risk factor for pneumonia after stroke, with aspiration occurring in more than 40% of patients with dysphagia.                                                                 | 491 (89.11)          | 60 (10.89)    |
| 3. International scales for stroke-related pneumonia include acute ischemic stroke-associated pneumonia score (AIS-APS) and spontaneous intracerebral hemorrhage-associated pneumonia score (ICH-APS). | 428 (77.68)          | 123 (22.32)   |
| 4. Stroke-associated pneumonia is new pneumonia that develops within 14 days of onset in nonmechanically ventilated stroke patients. (False)                                                           | 45 (8.17)            | 506 (91.83)   |
| 5. Early assessment, screening, and rehabilitation of swallowing function after acute stroke can reduce the incidence of pneumonia.                                                                    | 517 (93.83)          | 34 (6.17)     |
| 6. Anti-infective therapy should be initiated within 4 hours in all patients with suspected or confirmed stroke-associated pneumonia if patients were complicated by sepsis or septic shock. (False)   | 26 (4.72)            | 525 (95.28)   |
| 7. For stroke patients, anti-infective drugs can be used prophylactically. (False)                                                                                                                     | 291 (52.81)          | 260 (47.19)   |
| 8. Raising the head of the bed by 30°-45° is an effective measure to prevent stroke-associated pneumonia                                                                                               | 511 (92.74)          | 40 (7.26)     |
| 9. Dysphagia and aspiration after stroke can cause a variety of complications, including:                                                                                                              | 309 (56.08)          | 242 (43.92)   |
| 10. Aspiration and pneumonia are more likely to occur under combined factors.                                                                                                                          | 167 (30.31)          | 384 (69.69)   |
| 11. To avoid stroke-associated pneumonia, which of the following drugs should be minimized?                                                                                                            | 27 (4.90)            | 524 (95.10)   |
| 12. For aspiration pneumonia, anti-infective therapy should be covered.                                                                                                                                | 124 (22.50)          | 427 (77.50)   |

**Disclaimer/Publisher's Note:** The statements, opinions, and data contained in all publications are solely those of the individual author(s) and contributor(s) and not of MDPI and/or the editor(s). MDPI and/or the editor(s) disclaim responsibility for any injury to people or property resulting from any ideas, methods, instructions, or products referred to in the content.
